# Supplementary material for: RAD21 amplification epigenetically suppresses interferon signaling to promote immune evasion in ovarian cancer
Source: PubMed Central journal article supplement (PMC9663158; doi:10.1172/jci159628), 2022-11-15
Supplement: jci-132-159628-s188.pdf [file jci-132-159628-s188.pdf]

## Supplemental Tables

**Supplemental Table 1:** Copy number alterations from TCGA 572 samples.

**Supplemental Table 2:** RAD21 direct targets.

**Supplemental Tables 3-6.** Patient characteristics and sequences of siRNA, qRT-PCR and ChIP-qPCR primers.

**Supplemental Table 1 and Table 2 are available as excel files.**

**Supplemental Table 3. Patient characteristics.**

| Characteristic                    | All cases   |
|-----------------------------------|-------------|
| Number of patients                | 107         |
| Age at the time of surgery, years | 52.99± 9.43 |
| FIGO staging, n (%)               |             |
| I                                 | 13 (12.1%)  |
| II                                | 22 (20.6%)  |
| III                               | 58 (54.2%)  |
| IV                                | 14(13.1%)   |
| Adjuvant chemotherapy, n (%)      | 107 (100%)  |
| Chemotherapy regimens, n (%)      |             |
| TP (Paclitaxel + Carboplatin)     | 106 (99.0%) |

|                                      |          |
|--------------------------------------|----------|
| DP (Docetaxel + Carboplatin)         | 1 (1.0%) |
| <b>Median follow-up time, months</b> | 49.65    |

**Supplemental Table 4. The sequences of siRNAs, shRNA, sgRNAs and primers for genes cloning.**

| <b>Identifier</b> | <b>Sequences (5' - 3')</b> |
|-------------------|----------------------------|
| siNC              | UUCUCCGAACGUGUCACGUTT      |
| siRAD21-#1 (1)    | CTCCAAATATCTGTCAGCTAA      |
| siRAD21-#2 (2)    | ATCGATGAGCCCATTATTGAA      |
| siGMPS-#1         | GCATTTGCTATAAAGGAACAA      |
| siGMPS-#2         | GGGAAAGUCAUAGACCGAATT      |
| siCKS1B-#1        | GGAGGAAGCAUCUGAGUUUTT      |
| siCKS1B-#2        | GGAGUUUGAGUAUCGACAUTT      |
| siRAD54L-#1       | CTTTGTAATCATCCAGCTCTA      |
| siRAD54L-#2       | CCAGAGTGCAAGCCAGAAATT      |
| siYAP (3)         | GACAUCUUCUGGUCAGAGAdTdT    |
| siTEAD4 (4)       | GGAACAAACUGUGCCUGAATT      |
| shRAD21-#1        | CTCCAAATATCTGTCAGCTAA      |
| shRAD21-inducible | CCAGATAGCATCAGAAATCAT      |
| sgRad21-#2(mouse) | GCAGTGGCTGATCAAAATCG       |
| sgRad21-#3(mouse) | GTAACCGATGACATCTCGCTG      |

|                            |                         |
|----------------------------|-------------------------|
| <i>siRad21</i> (mouse) (5) | GCGGUAUAUUAGAUGACAATT   |
| RAD21-F                    | ATGTTCTACGCACATTTTGTTTC |
| RAD21-R                    | TTATATAATATGGAACCTTG    |
| TEAD4-F                    | TTGGAGGGCACGGCCGGCA     |
| TEAD4-R                    | TCATTCTTTCACCAGCCTG     |
| Rad21-F                    | ATGTTCTACGCACATTTTGT    |
| Rad21-R                    | TCAGATAATATGGAACCGTG    |

**Supplemental Table 5. Quantitative Real-Time PCR (qRT-PCR) Primers.**

| Genes          | Forward (5' - 3')       | Reverse (5' - 3')       |
|----------------|-------------------------|-------------------------|
| <i>18S</i>     | GTAACCCGTTGAACCCCATTT   | CCATCCAATCGGTAGTAGCG    |
| <i>RAD54L</i>  | AGGCAGGTCCTGTGATGATGA   | TCAAAGGTTTCCGAAAAGGAGA  |
| <i>CKS1B</i>   | CGGACAAATACGACGACGAGG   | CTCTGCTGAACGCCAAGATTCC  |
| <i>GMPS</i>    | CAAGGTTGTGGCACGTTCTG    | GCACGGTGAAGGTTCCACT     |
| <i>RAD21</i>   | AAGCCAAATACCTTCTTGCAGAC | CTGCTTCCCGATTTTCTCAG    |
| <i>YAP</i>     | TAGCCCTGCGTAGCCAGTTA    | TCATGCTTAGTCCACTGTCTGT  |
| <i>TEAD4</i>   | GGACACTACTCTTACCGCATCC  | TCAAAGACATAGGCAATGCACA  |
| <i>ISG15</i>   | GCGCAGATCACCCAGAAGAT    | TCCTCACCAGGATGCTCAGA    |
| <i>TNFAIP3</i> | TCCTCAGGCTTTGTATTTGAGC  | TGTGTATCGGTGCATGGTTTTA  |
| <i>ISG20</i>   | CTCGTTGCAGCCTCGTGAA     | CGGGTTCTGTAATCGGTGATCTC |
| <i>IFIT3</i>   | AAAAGCCCAACAACCCAGAAT   | CGTATTGGTTATCAGGACTCAGC |
| <i>IFI44</i>   | ATGGCAGTGACAACCTCGTTTG  | TCCTGGTAACTCTCTTCTGCATA |

|                |                         |                         |
|----------------|-------------------------|-------------------------|
| <i>DDX58</i>   | CTGGACCCTACCTACATCCTG   | GGCATCCAAAAAGCCACGG     |
| <i>g-RAD21</i> | GCCTGTGATGCCTGTAAG      | CCACTTGCTACTGACTGTATG   |
| <i>g-GAPDH</i> | CCGGGTTCATAACTGTCTGCTTC | TGGTTCACACCCATGACGAACA  |
| <i>Rad21</i>   | GCCCATGTATTTGAGTGCAA    | ACTCCCAGGAGAAGGTGTCC    |
| <i>Isg15</i>   | GGTGTCCGTGACTAACTCCAT   | TGGAAAGGGTAAGACCGTCCT   |
| <i>Ifi44</i>   | AACTGACTGCTCGCAATAATGT  | GTAACACAGCAATGCCTCTTGT  |
| <i>Ifit3</i>   | CCTACATAAAGCACCTAGATGGC | ATGTGATAGTAGATCCAGGCGT  |
| <i>Ddx58</i>   | AAGAGCCAGAGTGTGAGAATCT  | AGCTCCAGTTGGTAATTTCTTGG |
| <i>Actin</i>   | AGAGGGAAATCGTGCGTGAC    | CAATAGTGATGACCTGGCCGT   |

### Supplemental Table 6. ChIP-qPCR Primers.

| Genes          | Forward (5' - 3')        | Reverse (5' - 3')      |
|----------------|--------------------------|------------------------|
| <i>ISG15</i>   | AGTCCATGTGATGACAGCTTTA   | CAGAGTGAGCGGAAGAAACA   |
| <i>IFIT3</i>   | GGTGTACACACAGGCTTCTT     | GCCAAGCCTTCCTCTCATT    |
| <i>TNFAIP3</i> | CAACCCGCATACA AACTGAAAC  | GGGTGTGATCTCTCTTGGC    |
| <i>IFI44</i>   | CCCTCTGACTTCAATTCCTTGAT  | GACAGCATGCCAACTTCTCT   |
| <i>ISG20</i>   | CCCTGACTTCACTTGATAACAAAC | CAGCGGTGACTCATCTCTAAC  |
| <i>DDX58</i>   | GTGCCAGGGTAAGTCTATGTTA   | ATCTACTGGAGCTCTCCTACTG |

### REFERENCES

1. Mahmood SF, Gruel N, Chapeaublanc E, Lescure A, Jones T, Reyal F, et al. A siRNA screen identifies RAD21, EIF3H, CHRAC1 and TANC2 as driver genes within the 8q23, 8q24.3 and 17q23 amplicons in breast cancer with effects on cell growth, survival and transformation. *Carcinogenesis*. 2014;35(3):670-82.
2. Kong X, Ball AR, Jr., Pham HX, Zeng W, Chen HY, Schmiesing JA, et al. Distinct functions of human cohesin-SA1 and cohesin-SA2 in double-strand break repair. *Molecular and cellular biology*. 2014;34(4):685-98.
3. Xia Y, Chang T, Wang Y, Liu Y, Li W, Li M, et al. YAP promotes ovarian cancer cell tumorigenesis and is indicative of a poor prognosis for ovarian cancer patients. *PLoS One*. 2014;9(3):e91770.
4. Jiao S, Li C, Hao Q, Miao H, Zhang L, Li L, et al. VGLL4 targets a TCF4-TEAD4 complex to coregulate Wnt and Hippo signalling in colorectal cancer. *Nat Commun*. 2017;8:14058.
5. Mullenders J, Aranda-Orgilles B, Lhoumaud P, Keller M, Pae J, Wang K, et al. Cohesin loss alters adult hematopoietic stem cell homeostasis, leading to myeloproliferative neoplasms. *J Exp Med*. 2015;212(11):1833-50.
